# Supplementary material
Source: publisher site journal article supplement (https://www.dovepress.com/article/301802)
Supplement: Supplementary file 1 [file get_supplementary_file.php]

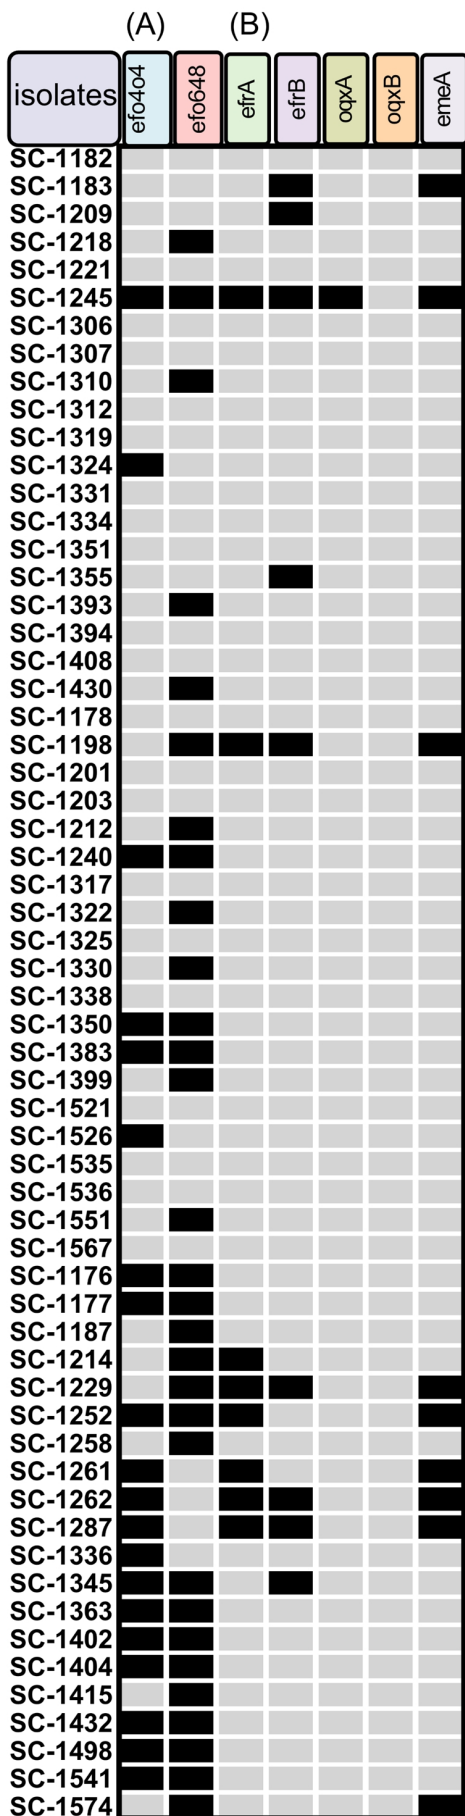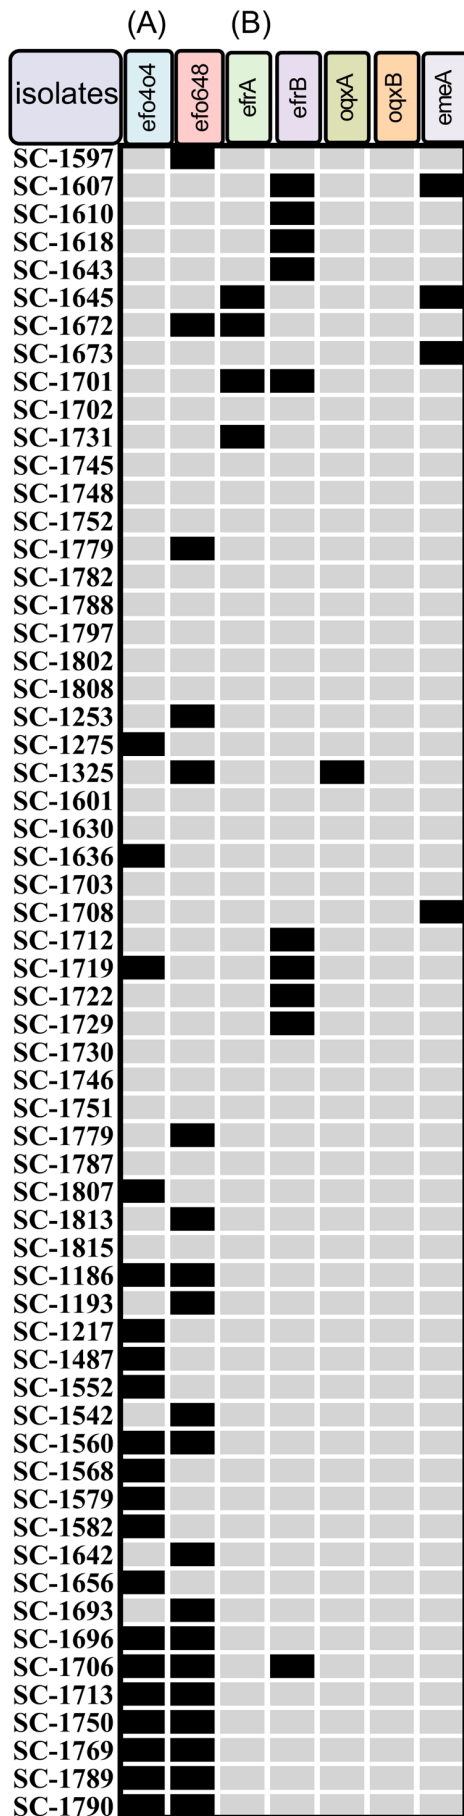

**Figure S1 Antibiotic resistant genes detected in the *E. faecium* strains.**

(A) Nitroreductase-coding genes *ef0404* and *ef0648*. (B) Efflux pump genes *efrA*, *efrB*, *oqxA*, *oqxB*, and *emeA*.
